# Supplementary material for: Re-wiring of energy metabolism promotes viability during hyperreplication stress in E. coli
Source: PubMed Central journal article supplement (PMC5302844; doi:10.1371/journal.pgen.1006590), 2017-01-27
Supplement: pgen.1006590.s004.pdf [file pgen.1006590.s004.pdf]

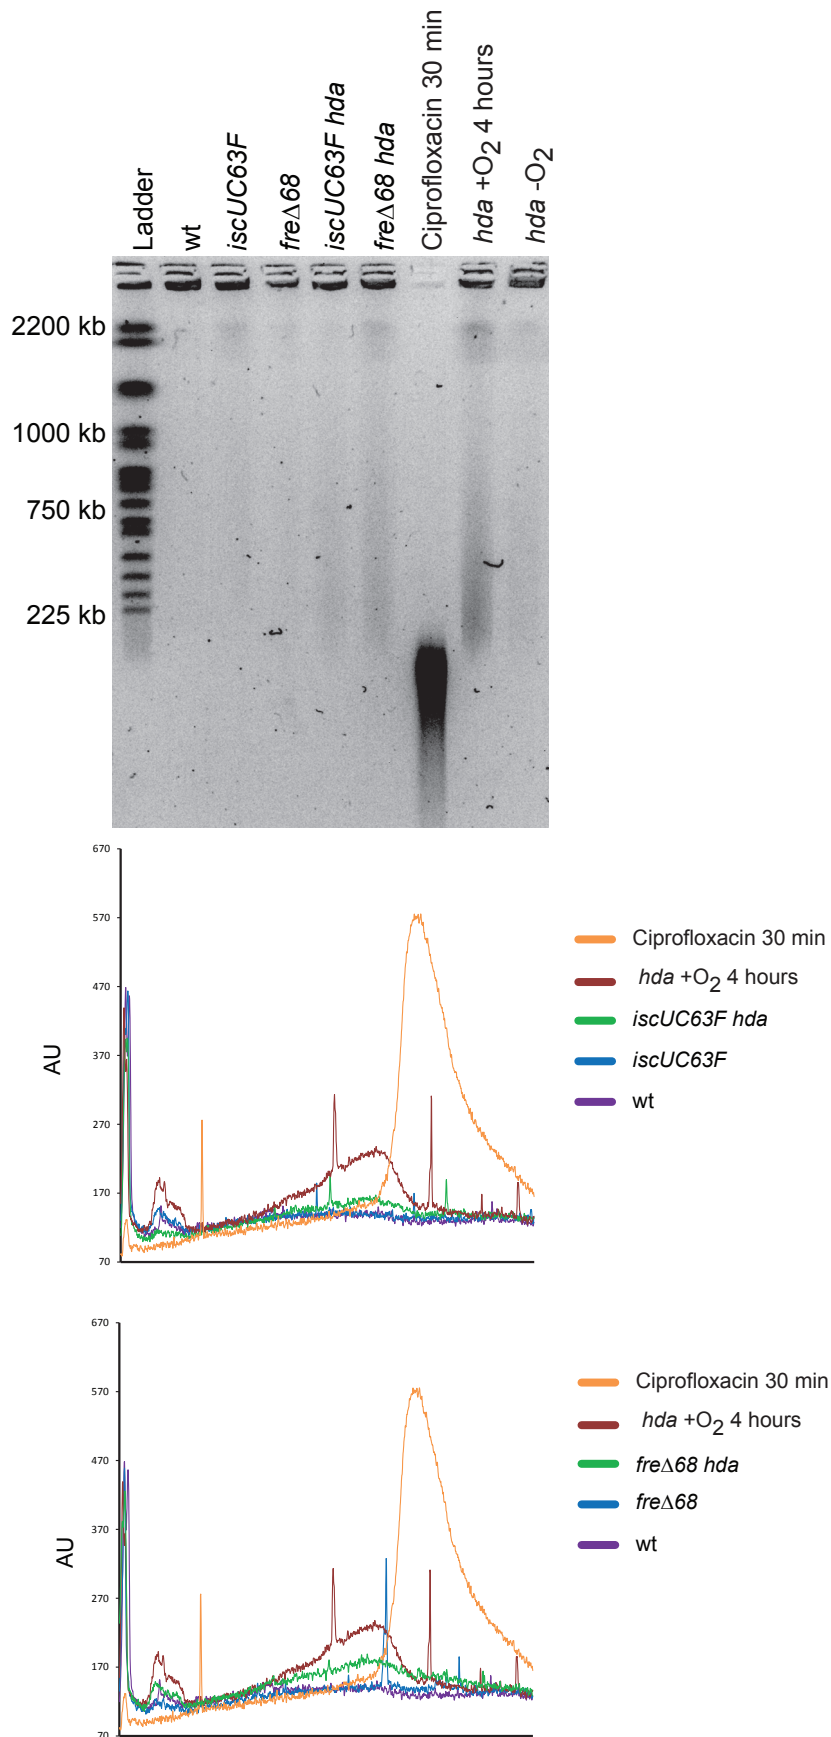

S1 Fig. Visualization of strand breaks by PFGE. Cells were grown aerobically in AB minimal medium supplemented with 0.2% glucose and 0.5% casamino acids except *hda* cells that were grown anaerobically and shifted for 4 hours to aerobic conditions. Wild-type cells treated for 30 minutes with 2 $\mu$ g/ml ciprofloxacin are used as strand break control. Top: PFGE gel. Bottom :line scan analysis of relevant lanes.
