# Supplementary material for: Re-wiring of energy metabolism promotes viability during hyperreplication stress in E. coli
Source: PubMed Central journal article supplement (PMC5302844; doi:10.1371/journal.pgen.1006590), 2017-01-27
Supplement: pgen.1006590.s005.pdf [file pgen.1006590.s005.pdf]

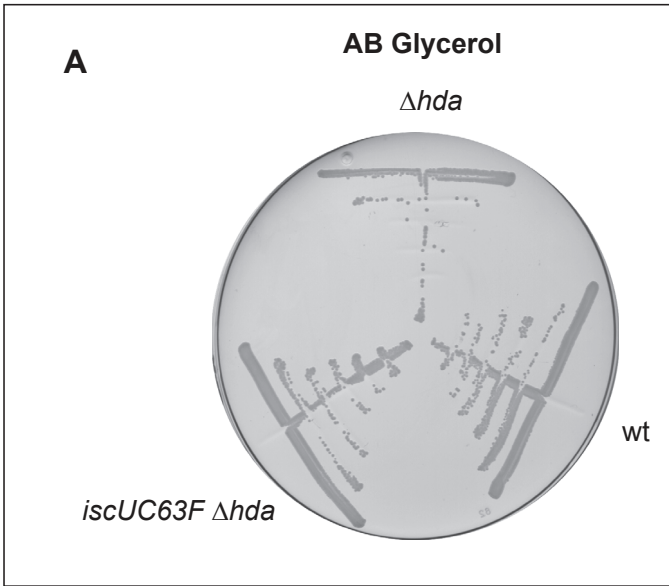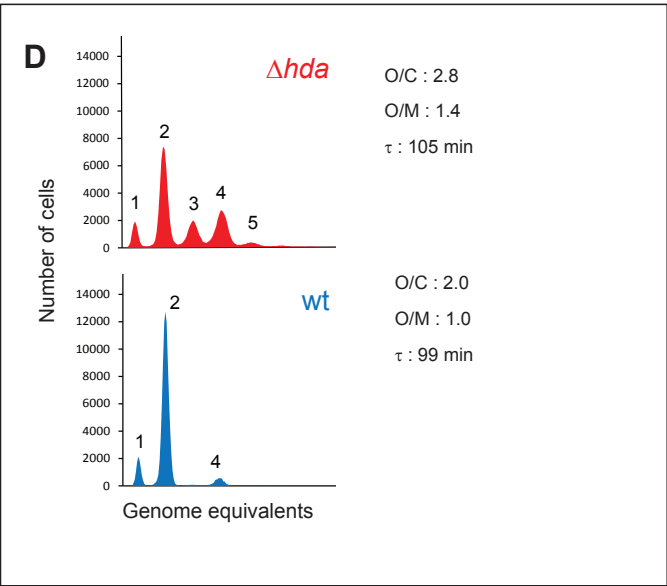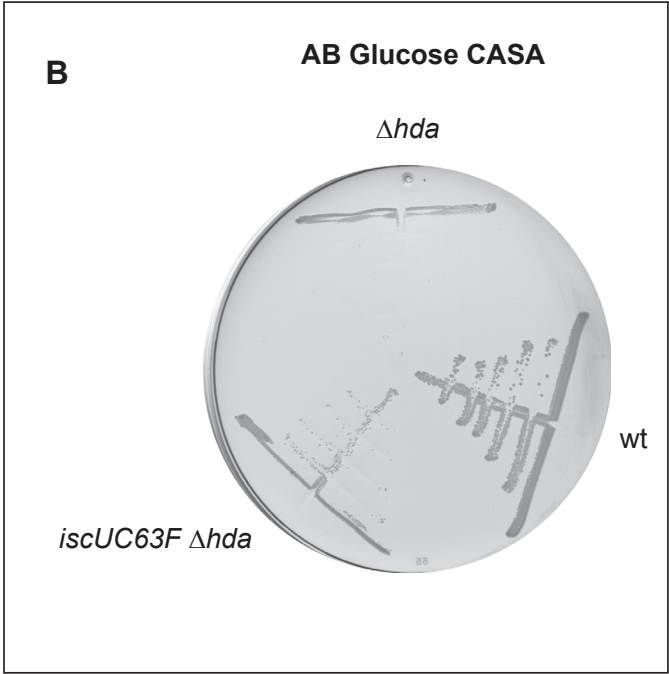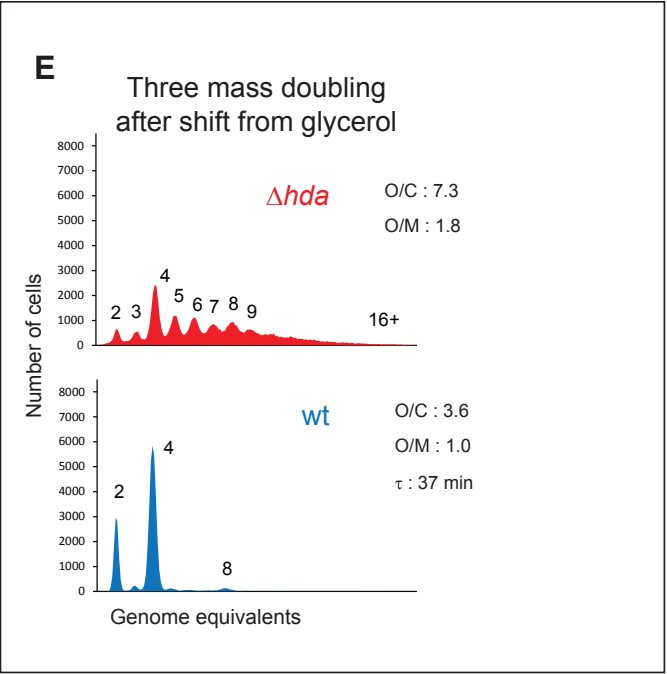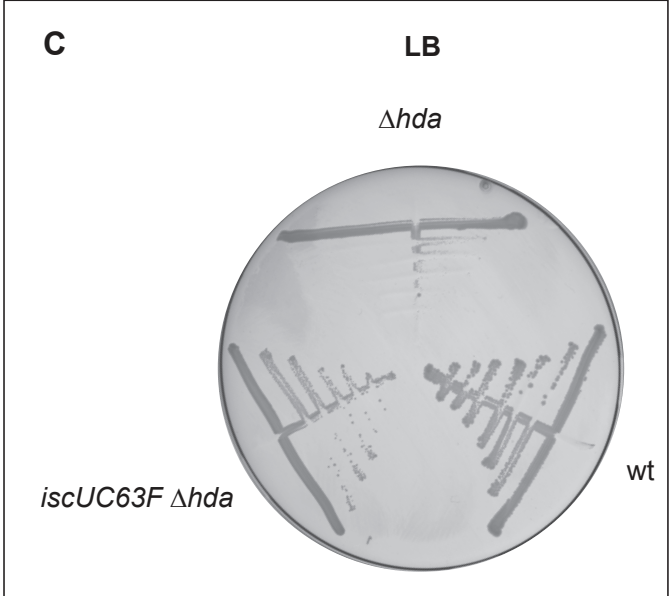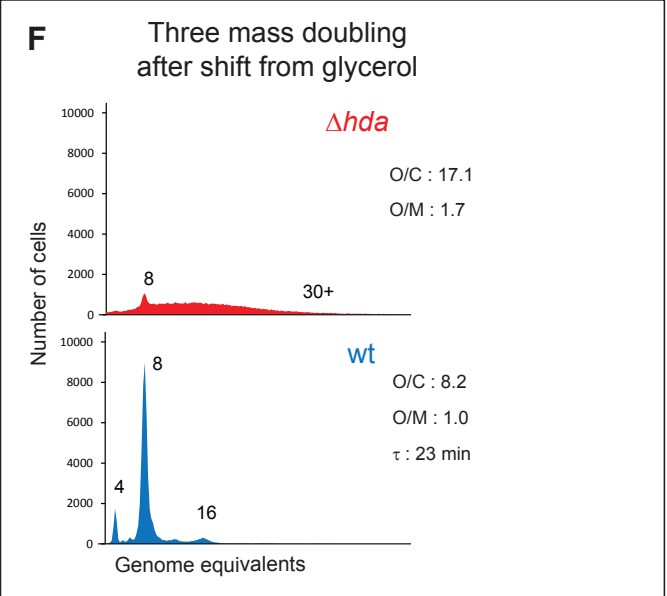

**S2 Fig. Hda is dispensable during slow growth.** A) The *hda::cat* mutation was introduced into wild-type cells under anaerobic conditions, restreaked on AB minimal medium plates supplemented with 0.2% glycerol along with wild-type and *hda iscUC63F* cells and incubated aerobically. B) The *hda::cat* mutation was introduced into wild-type cells under anaerobic conditions, restreaked on AB minimal medium plates supplemented with 0.2% glucose and 0.5% casamino acids along with wild-type and *hda iscUC63F* cells and incubated aerobically. C) *Hda* clones obtained on AB minimal medium supplemented with 0.2% glycerol were restreaked on LB plates along with wild-type and *hda iscUC63F* cells and incubated aerobically. D) Cells were grown exponentially in AB minimal medium supplemented with 0.2% glycerol and treated with rifampicin and cephalixin prior to flow cytometric analysis. E) Cells were grown exponentially in AB minimal medium then shifted to AB minimal medium supplemented with 0.2% glucose and 0.5% casamino acids medium for 3 mass doubling time or F) LB medium for 3 mass doubling time and treated with rifampicin and cephalixin prior to flow cytometric analysis. Each panel represents a minimum of 30000 cells. The average *ori*/cell (O/C), *ori*/mass (O/M) relative to wild-type and mass doubling time ( $\tau$ ) are inserted in the histograms.
