# Supplementary material for: Re-wiring of energy metabolism promotes viability during hyperreplication stress in E. coli
Source: PubMed Central journal article supplement (PMC5302844; doi:10.1371/journal.pgen.1006590), 2017-01-27
Supplement: pgen.1006590.s007.pdf [file pgen.1006590.s007.pdf]

$\Delta atpA \Delta hda \Delta cydB$

$\Delta atpA \Delta hda$

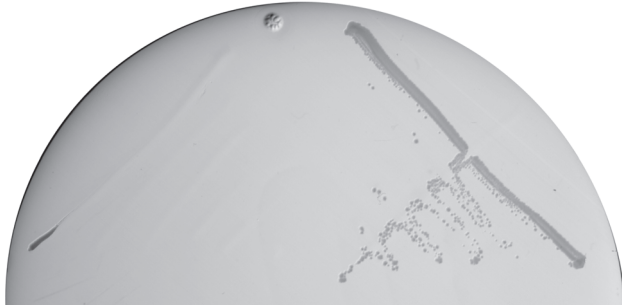

$\Delta atpB \Delta hda \Delta cydB$

$\Delta atpB \Delta hda$

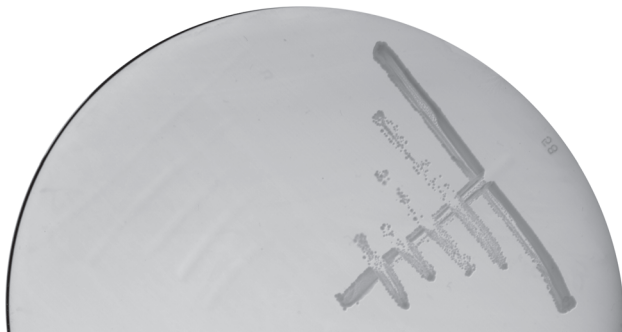

$iscUC63F \Delta cydB \Delta hda$

$iscUC63F \Delta hda$

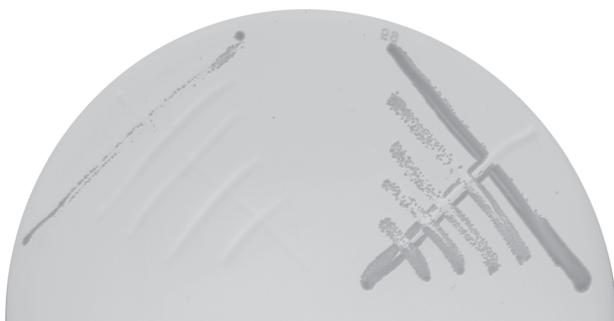

S4 Fig. Cytochrome bd-1 function is required for *atpA*, *atpB* and *iscUC63F* survival in absence of *hda*. The *hda::cat* mutation was introduced into the indicated strains under anaerobic conditions, restreaked on LB agar and incubated aerobically.
