# Supplementary material for: Re-wiring of energy metabolism promotes viability during hyperreplication stress in E. coli
Source: PubMed Central journal article supplement (PMC5302844; doi:10.1371/journal.pgen.1006590), 2017-01-27
Supplement: pgen.1006590.s008.pdf [file pgen.1006590.s008.pdf]

### OxyR Regulon

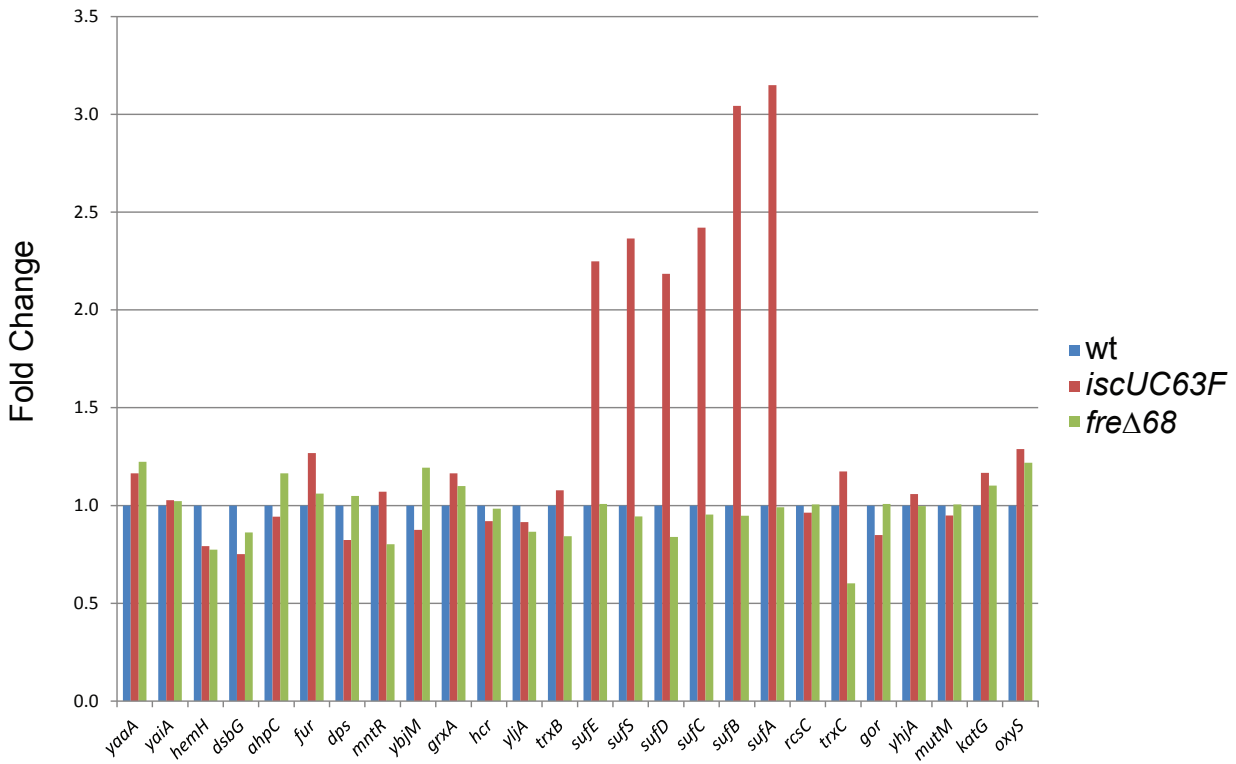

### Sox Regulon

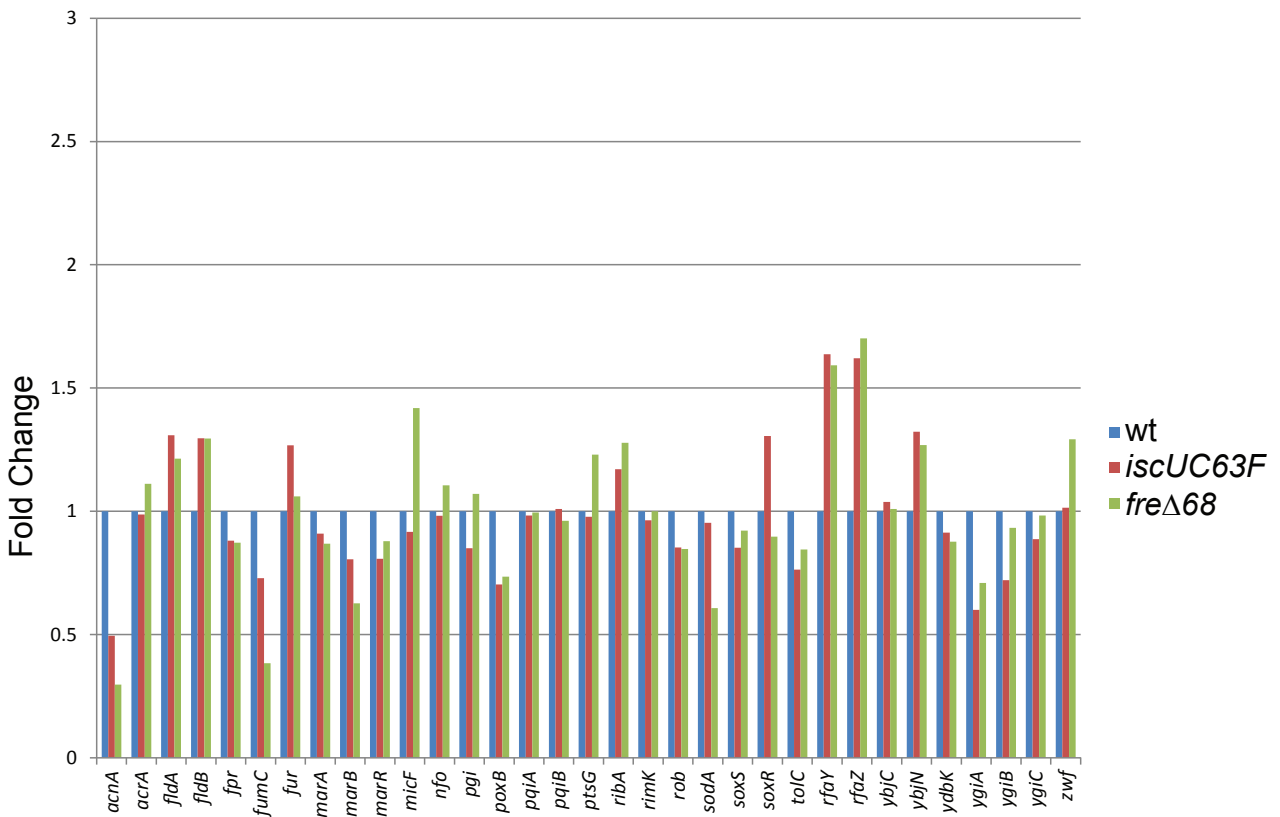

S5 Fig. The OxyR and SoxRS regulons in *iscU* and *fre* mutants. The expression level of selected OxyR and SoxRS controlled genes relative to wild-type extracted from the microarray experiment.
