# Supplementary material for: Re-wiring of energy metabolism promotes viability during hyperreplication stress in E. coli
Source: PubMed Central journal article supplement (PMC5302844; doi:10.1371/journal.pgen.1006590), 2017-01-27
Supplement: pgen.1006590.s009.pdf [file pgen.1006590.s009.pdf]

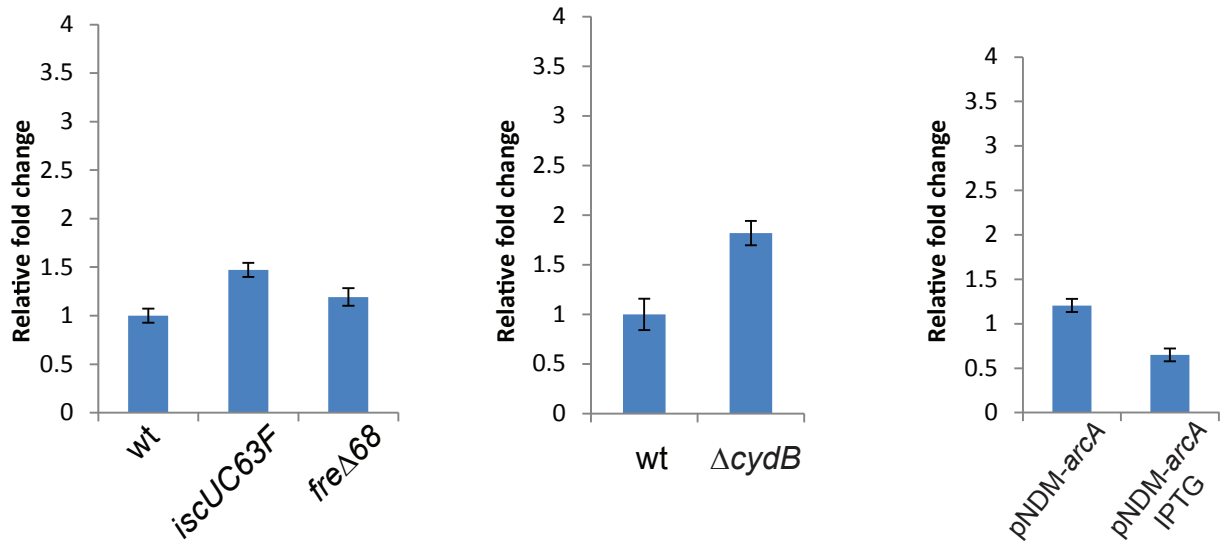

S6 Fig.

*katG* expression in *iscUC63F* and *freΔ68*,  $\Delta$ *cydB* and ArcA overproducing strains. Expression of *katG::lacZ* in cells growing in LB medium was measured by  $\beta$ -galactosidase assay. The results are expressed relative to wild type.
