# Supplementary material for: Re-wiring of energy metabolism promotes viability during hyperreplication stress in E. coli
Source: PubMed Central journal article supplement (PMC5302844; doi:10.1371/journal.pgen.1006590), 2017-01-27
Supplement: pgen.1006590.s010.pdf [file pgen.1006590.s010.pdf]

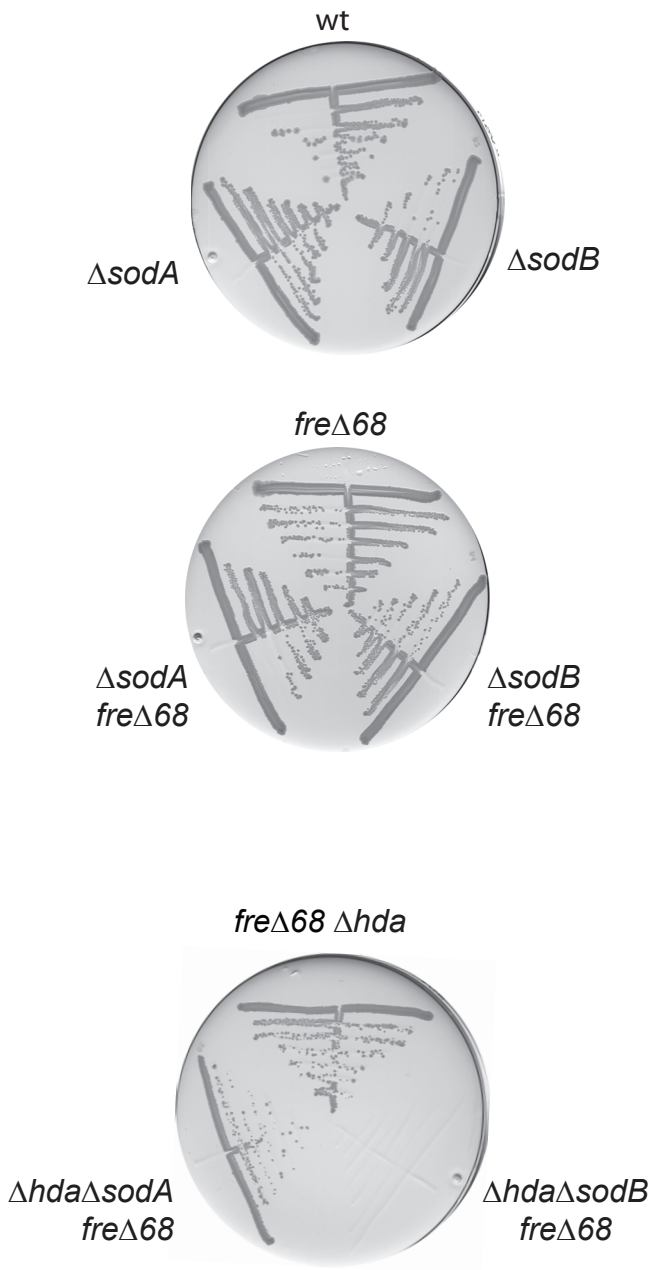

**S7 Fig. Effect of *sodA* and *sodB* mutations on growth of *hda* fre $\Delta 68$  cells**

The *sodA::kan* and *sodB::kan* mutations were introduced into *hda* fre $\Delta 68$  cells under anaerobic conditions and restreaked under aerobic conditions on LB agar.
